# Supplementary material for: Mitochondrial Aminoacyl-tRNA Synthetase and Disease: The Yeast Contribution for Functional Analysis of Novel Variants
Source: MDPI journal article supplement (doi:10.3390/ijms22094524), 2021-04-26
Supplement: s1 [file s1]

| Human <i>ARS</i> gene | Protein substitution modeled in yeast | Clinical phenotype associated to the substitution                                 | Yeast model                                                                                                                                                                                                                                                                                  | Yeast mutant phenotype                                                                                                                                                                 |
|-----------------------|---------------------------------------|-----------------------------------------------------------------------------------|----------------------------------------------------------------------------------------------------------------------------------------------------------------------------------------------------------------------------------------------------------------------------------------------|----------------------------------------------------------------------------------------------------------------------------------------------------------------------------------------|
| AARS2                 | Phe50Cys                              | Leukoencephalopathy with ovarian failure. In compound heterozygosis with Arg521*  | <i>ala1Δ</i> strain expressing <i>ALA1</i> mutant alleles cloned in a centromeric plasmid under its natural promoter in presence of <i>cytALA1</i> wild type allele (1)<br><br><i>ala1Δ</i> strain expressing human AARS mutant alleles cloned in a multicopy plasmid under ADH promoter (2) | (1) Thermosensitive strong decrease in oxidative growth, OCR, mitochondrial protein synthesis, ability to charge tRNA, OXPHOS complexes III and IV activities and cytochromes content. |
|                       | Phe131*                               | Ataxia without leukoencephalopathy. In compound heterozygosis with Ile328Met      |                                                                                                                                                                                                                                                                                              | (1)(2) Unable to support yeast growth                                                                                                                                                  |
|                       | Leu155Arg                             | Cardiomyopathy. In compound heterozygosis with Arg592Trp                          |                                                                                                                                                                                                                                                                                              | (1) Strong decrease in OCR and cytochromes content. Absent oxidative growth, mitochondrial protein synthesis, ability to charge tRNA and OXPHOS complexes III and IV activities        |
|                       | Ile328Met                             | Ataxia without leukoencephalopathy. In compound heterozygosis with Phe131*        |                                                                                                                                                                                                                                                                                              | (1)(2) Similar yeast cell growth compared to wildtype                                                                                                                                  |
|                       | Arg521*                               | Leukoencephalopathy with ovarian failure. In compound heterozygosis with Phe50Cys |                                                                                                                                                                                                                                                                                              | (1) Strong decrease in OCR and cytochromes content. Absent oxidative growth, mitochondrial protein synthesis, ability to charge tRNA and OXPHOS complexes III and IV activities        |
|                       | Arg58Gly                              | LBSL-group 1 <sup>1</sup> , in compound heterozygosis with Gln248*                |                                                                                                                                                                                                                                                                                              | Mild decrease in OCR                                                                                                                                                                   |
|                       | Arg179Cys                             | LBSL-group 1 <sup>1</sup> , in compound heterozygosis with Ser597Gly              |                                                                                                                                                                                                                                                                                              | Strong decrease in oxidative growth and OCR, strong increase in protein levels                                                                                                         |
|                       | Leu250Val                             | LBSL-group 1 <sup>1</sup> , in compound heterozygosis with Phe488Leu              |                                                                                                                                                                                                                                                                                              | Strong decrease in oxidative growth and OCR, mild decrease in protein levels                                                                                                           |

|                |           |                                                                             |                                                                                                                                                           |                                                                                |
|----------------|-----------|-----------------------------------------------------------------------------|-----------------------------------------------------------------------------------------------------------------------------------------------------------|--------------------------------------------------------------------------------|
| DARS2          | Ala262Val | LBSL-group 1 <sup>1</sup> , in compound heterozygosis with Tyr30*           | <i>msd1Δ</i> strain expressing <i>MSD1</i> mutant alleles cloned in a centromeric plasmid under its natural promoter                                      | Moderate decrease in oxidative growth and OCR                                  |
|                | Val481Met | LBSL-group 1 <sup>1</sup> , in compound heterozygosis with Gly128Arg        |                                                                                                                                                           | Thermosensitive strong decrease in oxidative growth and in OCR                 |
|                | Phe484Leu | LBSL-group 1 <sup>1</sup> , in compound heterozygosis with Leu250Val        |                                                                                                                                                           | Strong decrease in oxidative growth and OCR                                    |
|                | Leu588Val | LBSL-group 2 <sup>2</sup> , in compound heterozygosis with Arg188* or Met1? |                                                                                                                                                           | Strong decrease in oxidative growth and OCR, mild decrease in protein levels   |
|                | Ser597Gly | LBSL-group 1 <sup>1</sup> , in compound heterozygosis with Arg179Cys        |                                                                                                                                                           | Strong decrease in oxidative growth and OCR, strong increase in protein levels |
|                | Lys606Met | LBSL-group 2 <sup>2</sup> , in compound heterozygosis with Arg76Serfs*5     |                                                                                                                                                           | Mild decrease in OCR, mild increase in protein levels                          |
| GARS           | Asp146Asn | Charcot-Marie-Tooth disease. Dominant mutation                              | <i>grs1Δ</i> strain expressing <i>GRS1</i> mutant alleles cloned in a centromeric plasmid under its natural promoter (1)                                  | (1) Severe reduction of yeast cell growth                                      |
|                | Pro244Leu | Charcot-Marie-Tooth disease. Dominant mutation                              |                                                                                                                                                           | (1) Severe reduction of yeast cell growth                                      |
|                | Ile280Phe | Charcot-Marie-Tooth disease. Dominant mutation                              | <i>grs1Δ</i> strain expressing human <i>GARS</i> MTSA <sup>3</sup> WHEPΔ <sup>4</sup> mutant alleles cloned in a multicopy plasmid under ADH promoter (2) | (1) Similar yeast cell growth compared to wildtype                             |
|                | Gly327Arg | Distal motor neuropathy. Dominant mutation                                  |                                                                                                                                                           | (2) Unable to support yeast growth                                             |
|                | Ile334Asn | Infantile SMA <sup>5</sup> . Dominant mutation                              |                                                                                                                                                           | (2) Unable to support yeast growth                                             |
| GaTCAB complex | QRS1      | Gly133Val                                                                   | <i>her2Δ</i> strain expressing <i>HER2</i> mutant alleles cloned in a centromeric plasmid under its natural promoter                                      | Moderate reduction in oxidative growth and severe reduction in OCR             |
|                |           | Thr196Asn                                                                   |                                                                                                                                                           | Absent oxidative growth and OCR                                                |

|              |             |           |                                                                                                                                                |                                                                                                                          |                                                                                    |
|--------------|-------------|-----------|------------------------------------------------------------------------------------------------------------------------------------------------|--------------------------------------------------------------------------------------------------------------------------|------------------------------------------------------------------------------------|
|              |             | Arg197Lys | Fatal cardiomyopathy and lactic acidosis. These three missense mutations are found on the same allele in compound heterozygosis with Ala427Leu |                                                                                                                          | Mild reduction in oxidative growth and OCR                                         |
|              |             | Pro199His |                                                                                                                                                |                                                                                                                          |                                                                                    |
|              |             | Ala427Leu | Fatal cardiomyopathy and lactic acidosis. In compound heterozygosis with Thr196Asn, Arg197Lys and Pro199His                                    |                                                                                                                          |                                                                                    |
|              | <i>GATB</i> | Phe136Leu | Fatal cardiomyopathy and lactic acidosis. In compound heterozygosis with Ser194Trpfs*15                                                        | <i>pet112Δ</i> strain expressing <i>PET112</i> mutant alleles cloned in a centromeric plasmid under its natural promoter | Thermosensitive moderate reduction in oxidative growth and severe reduction in OCR |
| <i>HARS2</i> |             | Leu200Val | Perrault syndrome. Δ200-211 on the same allele, in compound heterozygosis with Val368Leu                                                       | <i>hts1Δ</i> strain expressing <i>HTS1</i> mutant alleles cloned in a centromeric plasmid under its natural promoter     | Similar yeast cell growth compared to wildtype                                     |
|              |             | Δ200-211  | Perrault syndrome. Leu200Val on the same allele, in compound heterozygosis with Val368Leu                                                      |                                                                                                                          | Unable to support yeast growth                                                     |
|              |             | Val368Leu | Perrault syndrome. In compound heterozygosis with Leu200Val and Δ200-211                                                                       |                                                                                                                          | Reduced yeast cell growth                                                          |
| <i>KARS</i>  |             | Ala2Val   | Developmental delay, intellectual disability and/or microcephaly. In compound heterozygosis with Arg108Cys                                     | <i>krs1Δ</i> strain expressing <i>KRS1</i> mutant alleles cloned in a centromeric plasmid under its natural promoter (1) | (3) Increased yeast growth                                                         |

|  |           |                                                                                                            |                                                                                                                                                                                                                                                                                    |                                                                                                                                                                                                            |
|--|-----------|------------------------------------------------------------------------------------------------------------|------------------------------------------------------------------------------------------------------------------------------------------------------------------------------------------------------------------------------------------------------------------------------------|------------------------------------------------------------------------------------------------------------------------------------------------------------------------------------------------------------|
|  | Ala57Pro  | Developmental delay, intellectual disability and/or microcephaly. In compound heterozygosis with Pro533Arg | <p><i>msk1Δ</i> strain expressing human <i>mtKARS</i> mutant alleles cloned in a centromeric plasmid under the tetO-CYC1 promoter (2)</p> <p><i>krs1Δ</i> strain expressing human <i>cytKARS</i> mutant alleles cloned in a multicopy plasmid under the tetO-CYC1 promoter (3)</p> | <p>(2) Thermosensitive mild reduction in oxidative growth and OCR; mild reduction in mitochondrial protein synthesis</p> <p>(3) Mild reduced yeast growth</p>                                              |
|  | Arg108Cys | Developmental delay, intellectual disability and/or microcephaly. In compound heterozygosis with Ala2Val   |                                                                                                                                                                                                                                                                                    | <p>(2) Absent oxidative growth, OCR and mitochondrial protein synthesis. Moderate severe reduction of protein levels</p> <p>(3) Unable to support yeast growth</p>                                         |
|  | Tyr173His | ARNSHI <sup>6</sup> . Homozygosis                                                                          |                                                                                                                                                                                                                                                                                    | <p>(1) Mild reduced yeast growth</p> <p>(2) Absent oxidative growth</p> <p>(3) Moderate reduced yeast growth</p>                                                                                           |
|  | Arg205Cys | Developmental delay, intellectual disability and/or microcephaly. Homozygosis                              |                                                                                                                                                                                                                                                                                    | <p>(2) Severe decrease in oxidative growth, OCR and mitochondrial protein synthesis</p> <p>(3) Moderate reduced yeast growth</p>                                                                           |
|  | Leu233Val | Leukoencephalopathy. Homozygosis                                                                           |                                                                                                                                                                                                                                                                                    | <p>(1) Mild reduced yeast growth</p>                                                                                                                                                                       |
|  | Phe291Val | Developmental delay, intellectual disability and/or microcephaly. In compound heterozygosis with Pro499Leu |                                                                                                                                                                                                                                                                                    | <p>(2) Mild reduction in oxidative growth, severe decrease in OCR and markedly reduced mitochondrial protein synthesis</p> <p>(3) Moderate reduced yeast growth</p>                                        |
|  | Ile346Thr | Developmental delay, intellectual disability and/or microcephaly. Homozygosis                              |                                                                                                                                                                                                                                                                                    | <p>(2) Mild reduction in oxidative growth and mitochondrial protein synthesis, moderate severe reduction in OCR</p> <p>(3) Moderate reduced yeast growth</p>                                               |
|  | Arg348Cys | Developmental delay, intellectual disability and/or microcephaly. In compound heterozygosis with His402Tyr |                                                                                                                                                                                                                                                                                    | <p>(2) Moderate severe reduction in oxidative growth, severe decrease in OCR. Moderate severe decrease in mitochondrial protein synthesis and protein levels</p> <p>(3) Unable to support yeast growth</p> |

|  |                     |                                                                                                               |  |                                                                                                                                                                            |
|--|---------------------|---------------------------------------------------------------------------------------------------------------|--|----------------------------------------------------------------------------------------------------------------------------------------------------------------------------|
|  | Arg351Trp           |                                                                                                               |  | (1) Unable to support yeast growth                                                                                                                                         |
|  | Asp377Asn           | ARNSHI <sup>6</sup> . Homozygosis                                                                             |  | (1) Mild reduced yeast growth<br>(2) Moderate reduced yeast growth<br>(3) Moderate reduced yeast growth                                                                    |
|  | His402Tyr           | Developmental delay, intellectual disability and/or microcephaly. In compound heterozygosis with Arg348Cys    |  | (2) Moderate severe reduction in oxidative growth, severe decrease in OCR and moderate severe decrease in mitochondrial protein synthesis<br>(3) Mild reduced yeast growth |
|  | Glu427_Leu428insArg | Leukoencephalopathy. In compound heterozygosis with Leu596Phe                                                 |  | (1) Severe reduced yeast growth                                                                                                                                            |
|  | Pro499Leu           | Developmental delay, intellectual disability and/or microcephaly. In compound heterozygosis with Phe291Val    |  | (2) Thermosensitive mild reduction in oxidative growth, severe reduction in OCR and mitochondrial protein synthesis<br>(3) Unable to support yeast growth                  |
|  | Arg505His           | Leukoencephalopathy. In compound heterozygosis with Pro533Ser                                                 |  | (1) Severe reduced yeast growth                                                                                                                                            |
|  | Pro533Arg           | Developmental delay, intellectual disability and/or microcephaly. In compound heterozygosis with Ala57Pro     |  | (2) Absent oxidative growth, OCR and mitochondrial protein synthesis<br>(3) Unable to support yeast growth                                                                 |
|  | Pro533Ser           | Leukoencephalopathy. In compound heterozygosis with Arg505His                                                 |  | (1) Mild reduced yeast growth                                                                                                                                              |
|  | Phe585Cys           | Developmental delay, intellectual disability and/or microcephaly. In compound heterozygosis with Gln75Serfs*2 |  | (2) Severe decrease in oxidative growth, OCR and mitochondrial protein synthesis<br>(3) Moderate reduced yeast growth                                                      |

|              |             |                                                                                                                    |                                                                                                                                                                                                                        |                                                                                                           |
|--------------|-------------|--------------------------------------------------------------------------------------------------------------------|------------------------------------------------------------------------------------------------------------------------------------------------------------------------------------------------------------------------|-----------------------------------------------------------------------------------------------------------|
|              | Thr587Met   | Leukoencephalopathy. In compound heterozygosis with Ile294Thr                                                      |                                                                                                                                                                                                                        | (1) Mild reduced yeast growth                                                                             |
|              | Asn591Ile   | Developmental delay, intellectual disability and/or microcephaly. Microcephaly. Homozygosis                        |                                                                                                                                                                                                                        | (2) Absent oxidative growth, OCR and mitochondrial protein synthesis<br>(3) Moderate reduced yeast growth |
|              | Leu596Phe   | Leukoencephalopathy. In compound heterozygosis with Glu427_Leu428insArg                                            |                                                                                                                                                                                                                        | (1) Mild reduced yeast growth                                                                             |
| <i>LARS2</i> | c. 1077delT | Perrault syndrome with POF <sup>7</sup> and sensorineural hearing loss. In compound heterozygosis with Thr522Asn   | <i>nam2Δ</i> strain expressing human <i>LARS2</i> mutant alleles cloned in an integrating vector and harboring a mutation in <i>ADE2</i> gene, causing a red pigment production in presence of functional mitochondria | Non-functional protein                                                                                    |
|              | Thr522Asn   | Perrault syndrome with POF <sup>7</sup> and sensorineural hearing loss. Homozygosis                                |                                                                                                                                                                                                                        | Reduced protein activity                                                                                  |
|              | Thr629Met   | Perrault syndrome with POF <sup>7</sup> and sensorineural hearing loss. In compound heterozygosis with c. 1077delT |                                                                                                                                                                                                                        | Similar protein activity compared to wild type                                                            |
| <i>RARS2</i> | Trp241Arg   | Pontocerebellar hypoplasia type 6. In compound heterozygosis with Gln12Arg                                         | <i>msr1Δ</i> strain expressing <i>MSR1</i> mutant alleles cloned in a centromeric plasmid under <i>CYC1</i> promoter or under its natural promoter                                                                     | Similar oxidative growth compared to wild type                                                            |
|              | Arg245Gln   | Pontocerebellar hypoplasia type 6. In compound heterozygosis with Arg469His                                        |                                                                                                                                                                                                                        | Strong decrease in oxidative growth                                                                       |

|       |           |                                                                                                                                                                     |                                                                                                                                                                                                                                                                  |                                                                                                                    |
|-------|-----------|---------------------------------------------------------------------------------------------------------------------------------------------------------------------|------------------------------------------------------------------------------------------------------------------------------------------------------------------------------------------------------------------------------------------------------------------|--------------------------------------------------------------------------------------------------------------------|
|       | Arg469His | Pontocerebellar hypoplasia type 6. In compound heterozygosis with Arg245Gln                                                                                         |                                                                                                                                                                                                                                                                  | Absent oxidative growth and OCR                                                                                    |
| TARS2 | Pro282Leu | Axial hypotonia and severe psychomotor delay associated with multiple mitochondrial respiratory chain defects. In compound heterozygosis with g.4255A_G; c.695_3A_G | <p><i>ths1Δ</i> strain expressing <i>THS1</i> mutant alleles cloned in a centromeric plasmid under TEF promoter (1)</p> <p><i>ths1Δ</i> strain expressing human TARS2 MTSA<sup>3</sup> mutant alleles cloned in a centromeric plasmid under TEF promoter (2)</p> | <p>(1) Severe reduction of protein levels</p> <p>(2) Similar yeast cell growth compared to wild type</p>           |
| VARS2 | Thr367Ile | Mitochondrial Encephalomyopathy. Homozygosis                                                                                                                        | <i>vas1Δ</i> strain expressing <i>VAS1</i> mutant alleles cloned in a centromeric plasmid under its natural promoter in presence of <i>cytVAS1</i> wild type allele                                                                                              | Mild reduced oxidative growth and OCR                                                                              |
|       | Thr647Met | Lactic acidosis with encephalomyopathy. In compound heterozygosis with Arg773Gln                                                                                    |                                                                                                                                                                                                                                                                  | Strong decrease in oxidative growth and OCR. Thermosensitive mild decrease in protein levels                       |
|       | Arg773Gln | Lactic acidosis with encephalomyopathy. In compound heterozygosis with Thr647Met                                                                                    |                                                                                                                                                                                                                                                                  | Thermosensitive moderate decrease in oxidative growth and OCR. Thermosensitive moderate decrease in protein levels |
| WARS2 | Val278Gly | Growth retardation and leukoencephalopathy. In compound heterozygosis with Lys313Met                                                                                | <i>msw1Δ</i> strain expressing <i>MSW1</i> mutant alleles cloned                                                                                                                                                                                                 | Absent oxidative growth and OCR                                                                                    |

|       |           |                                                                                      |                                                                                                                      |                                                                                 |
|-------|-----------|--------------------------------------------------------------------------------------|----------------------------------------------------------------------------------------------------------------------|---------------------------------------------------------------------------------|
|       | Lys313Met | Growth retardation and leukoencephalopathy. In compound heterozygosis with Val278Gly | in a centromeric plasmid under its natural promoter                                                                  | Thermosensitive moderate reduction in OCR                                       |
| YARS2 | Pro122Arg | MLASA2 <sup>8</sup> . In compound heterozygosis with Leu208Arg                       | <i>msy1Δ</i> strain expressing <i>MSY1</i> mutant alleles cloned in a centromeric plasmid under its natural promoter | Absent oxidative growth and OCR                                                 |
|       | Leu208Arg | MLASA2 <sup>8</sup> . In compound heterozygosis with Pro122Arg                       |                                                                                                                      | Moderate severe reduction in oxidative growth and OCR                           |
|       | Asp311Glu | MLASA2 <sup>8</sup> . Homozygosis                                                    |                                                                                                                      | Strong reduction in oxidative growth, OCR and cytochromes content               |
|       | Cys369Tyr | MLASA <sup>9</sup> . In compound heterozygosis with Val383_Glu388dup                 |                                                                                                                      | Thermosensitive strong reduction in oxidative growth. Moderate reduction in OCR |
|       | Leu392Ser | MLASA <sup>9</sup> . Homozygosis                                                     |                                                                                                                      | Moderate reduction in OCR                                                       |

**Supplementary Table 1.** Human and yeast phenotype associated with mutations in ARS2. Numbers between “()” link yeast phenotype for each mutation modelled with the corresponding yeast model.

<sup>1</sup> Leukoencephalopathy with brainstem and spinal cord involvement and lactate elevation with early severe cerebral hypoplasia/atrophy

<sup>2</sup> Leukoencephalopathy with brainstem and spinal cord involvement and lactate elevation with whitematter abnormalities without long tract involvement

<sup>3</sup> Mitochondrial targeting signal

<sup>4</sup> Protein domain

<sup>5</sup> Spinal muscular atrophy

<sup>6</sup> Autosomal-recessive non syndromic hearing impairment

<sup>7</sup> Premature ovarian failure

<sup>8</sup> Myopathy, lactic acidosis, and sideroblastic anemia-2

<sup>9</sup> Myopathy, lactic acidosis, and sideroblastic anemia
