# Supplementary material for: Mitochondrial Aminoacyl-tRNA Synthetase and Disease: The Yeast Contribution for Functional Analysis of Novel Variants
Source: MDPI journal article supplement (doi:10.3390/ijms22094524), 2021-04-26
Supplement: s1 [file s1]

**Supplementary Figure 1. Alignment of human YARS and yeast Msy1 proteins with % identity and similarity.**  
**Alignment was performed with Clustal Omega at <https://www.ebi.ac.uk/Tools/msa/clustalo/>, using default parameters.**  
**Mutated amino acids modeled in yeast through homologous complementation are highlighted in green if conserved and in yellow if present in conserved stretches, thus requiring construction of “humanized alleles”.**

|        |                                                                             |     |
|--------|-----------------------------------------------------------------------------|-----|
| hYARS2 | -----MAAPILRSFSWGRWSGTLNLSVL-----LPLGL---RKAHSGAQGLLAAQ                     | 42  |
| yMsy1  | MLELRSCSNLVNSSRRLVPLVTYSGLSAITLPKSRFYSQPSALEVQGTSDSRSDNILDEL                | 60  |
|        | :. * . : ** : : : * . * . : : * : : : *                                     |     |
| hYARS2 | KARGLFKDFFPETGTKIPELFDGR--TASFPQTIYCGFDPTADSLHVGHLALLGLFH                   | 100 |
| yMsy1  | KQRLVLSQ-----VSQPESFLRTKLNGNDKIKLYCGVDPTAQSLHLGNLVPLMVLLH                   | 112 |
|        | * ***. : :. ** * * . . . : : ***. *** : *** : * : * : *                     |     |
| hYARS2 | LQRAGHNVIALVGGATARLGDPSGRTKEREALETERVRANARALRLGLEALAAH----                  | 155 |
| yMsy1  | FYVKGHDIVTVIGGATGKVGDPESGRKTERDVMENDIRQSNVASISQQLQRFKNGLEYR                 | 172 |
|        | : * : : : : : : : : : : : : : : : : : : : : : : : : : : : * : : *           |     |
| hYARS2 | -QQLFTDGRSWGSTVLDNSAWYQKQHLVDFLAAVGGHFRMGTTLSRQSVQLRDKSPEGM                 | 214 |
| yMsy1  | NRCALTEDVPSGKYTPRNNFNWWDIKMLDFLADFGRHIRVQSM LARDSISSRLQTKNGL                | 232 |
|        | : : : . * . : * : * : : : : : : * * : : : : : : : * : : : : *               |     |
| hYARS2 | SLAEFFYQVLQAYDFYLFQRYGCRVQLGGSQDLGNIMSGYEFINKLTG----EDVFGIT                 | 270 |
| yMsy1  | GFNEFTYQVLQAYDFYHLYKEENVTIQVGGNDQWGNITAGIDLINRIQPIKNKGLPFGIT                | 292 |
|        | . : * * * * * * * * * * : : . : : * : * * * * : * : : : : : : * * * *       |     |
| hYARS2 | VPLITSTTGAKLGKSAGNAVWLNDRDKTSPFELYQFFVRQPD DSVERYLKLFTFLPLPEID              | 330 |
| yMsy1  | VPLLTTATGEKFGKSAGNAVFIDPSINTAYDVYQFFYNTLDADVPKFLKIFTFLNSSEIK                | 352 |
|        | *** : : : * * : * * * * * : : . . : : : * * * . * . * : : * : * * * * * * * |     |
| hYARS2 | HIMQLHVKEPERRGPQKRLAAEVTKLVHGREGLDSAKRCTQALYHSSIDALEVMSDQELK                | 390 |
| yMsy1  | KIVETHIKSPSLRYQTLLAKEVTDMLYGVGSGSDSEALSNIIIFGRYDGT---LSAAKL                 | 409 |
|        | : : : * : * . * * * . * * * * : : * . . : : : : : : : : : : * : *           |     |
| hYARS2 | E FKEAPFSEFFLDPGTSVLDTCRKANAIPDGPRGYRMITEGGVSINHQQVTNPESVLIV                | 450 |
| yMsy1  | DLCKKARILQYADREIDLKICKLVNCSV--SEARRKLSQGSVYLHHSKSKVNENISNL                  | 467 |
|        | : * * : * : : : : * : * . . . * : : * . * : * : . * : : :                   |     |
| hYARS2 | GQHILKNGLSLLKIGKRNFYIIKWLQL                                                 | 477 |
| yMsy1  | APFLIDDRVLILRIGKQKCFIEMR--                                                  | 492 |
|        | . . : : : : : * : * * : : : * * :                                           |     |

Identity: 31,1%  
Similarity: 66,9%
